# Supplementary material for: Extracorporeal life support with left ventricular decompression—improved survival in severe cardiogenic shock: results from a retrospective study
Source: PeerJ. 2017 Sep 29;5:e3813. doi: 10.7717/peerj.3813 (PMC5624302; doi:10.7717/peerj.3813)
Supplement: Supplemental Information 2 [file peerj-05-3813-s002.xlsx]

## Sheet: Page1
																										preopreative laboratory values									laboratory values after 1 day of support										laboratory values after 3 days of support
Patient	sex (1=female, 0=male)	age	ECMO (0=central+vent, 1=central w/o vent, 2= peripheral)	Diagnose (1=DCM, 2=ICM, 3=acute myocarditis, 4=MI, 5=others, 7= aortic heart disease)	präOP IABP	prä OP ECMO-femoral	Exitus under support	duration of ECMO support	ventilation (h)	in-hospital stay (d)	dead	Follow-up (d)	post cardiotomy	cardiogenic shock	Bridge to Bridge	Bridge to Transplant	Bridge to Recovery	in-hospital mortality	pre-OP intubation	exact pre-OP (%)	EF severly reduced	EF moderately reduced	EF lightly reduced	inotropic support pre-OP	BMI	Kreatininmgdl	GOTUl	GPTUl	pH	pCO2mmHg	paO2mmHg	FiO2	HorovitzIndexmmHg	Laktatmgdl	Kreatininmgdl_A	Bilirubinges.mgdl_A	GOTUl_A	GPTUl_A	pH_A	pCO2mmHg_A	paO2mmHg_A	FiO2_A	HorovitzIndexmmHg_A	Laktatmgdl_A	Kreatininmgdl_B	Bilirubinges.mgdl_B	GOTUl_B	GPTUl_B	pH_B
1	1	24.73	2	3	1	0	0	7	268	11	1	7	0	1	0	0	0	1	1		1	0	0	1	23.6	3.49	259	596	7.48	34	115	100	115		1.89	1.9	524	199	7.49	40	212	70		15.3	1.22	7.4	505	124	7.49
2	0	67.58	2	5	0	0	1	7	157	7	1	7	1	1	0	0	0	1	1		1	0	0	1	27.8	1.06	45	36	7.369	42.4	215.9	100			1.85	4	871	133	7.62	29	355	100	355	38	3.03	2.9	1095	205	7.32
3	1	72.2	1	5	1	0	1	8	222	12	1	8	0	1	0	0	0	1	1		1	0	0	1		1.29	710	234	7.36	35.7	42	100	42	134	1.38	4.8	3063	1027	7.44	43.1	124	21	590	27	1.55	4.5	1601	811	7.42
4	1	28.47	1	5	0	0	0	5	362	43	0	2828	1	1	0	0	1	0	0		1	0	0	1	23.12	0.62	12	13	7.42	37.1	170.8	100		63	0.92	4.3	479	46	7.37	34.2	161	30	536	19	1.01	2.3	285	28	7.34
5	0	44.07	2	3	1	0	0	3	1615	51	0	2613	0	1	1	0	0	0	1		1	0	0	1	30.9	1.64			7.45	30.5	122	70	175	83	1.36	1.3	1707	999	7.53	45.7	205	30	683	41	1.34	1.8	1087	877	7.4
6	0	66.26	1	7	0	0	1	3	69	2	1	2	1	1	0	0	0	1	1	10	1	0	0	1	27.8	3	4478	3067	7.09	40	45.3	60	76		2.16	8	4638	780	7.33	42.9	121	30	403	103
7	1	79.01	1	0.05	0	0	1	1	11	4	1	1	1	1	0	0	0	1	0		1	0	0	1	23.2	0.85	34	23	7.23	44.7	216.4	100
8	1	72.98	2	2	1	0	1	2	7	4	1	2	0	1	0	0	0	1	1		1	0	0	1	21	1.73	30	46	7.28	44.5	88.6	40	221		2.12	3.8	46	29	7.57	34	118	50	236	22
9	0	66.16	2	1	1	0	1	8	184	33	1	8	0	1	0	0	0	1	1	20	1	0	0	1	29	3.02	50	42	7.29	26.3	146	35	417		1.76	12.6	228	52	7.52	30.4	243		324	12	1.04	28.4	345	49	7.43
10	0	58.34	2	3	0	0	0	10	370	28	1	15	0	1	1	0	0	1	1		1	0	0	1	32.7	2.64	3414	4893	7.09	44	128	100	128		2.47	7.3	4081	2122	7.48	41.5	112	60		49	1.94	7.3	608	336	7.45
11	0	48.93	1	7	1	0	1	1	88	7	1	1	0	1	0	0	0	1	1		1	0	0	1	24.4	3.56	44	32	7.17	57.7	135	100	135	78
12	0	47.51	1	7	1	0	1	3	112	3	1	3	0	1	0	0	0	1	1		1	0	0	1	25.9	1.59	1030	94	7.45	36.6	64	100	64	73	1.39	6	4989	1027	7.42	36.5	262	100	262	41
13	0	55.18	1	7	0	0	1	6	123	17	1	6	1	1	0	0	0	1	0		1	0	0	1	25	2.09	76	53	7.432	37.9	126.2	90			1.04	2.4	484	158	7.4	48.6	246	30	820	17	0.88	1.7	544	108	7.5
14	0	53.89	2	2	1	0	1	15	518	32	1	15	0	1	0	0	0	1	1		1	0	0	1	29.4	1.63	57	22	7.34	45.4	118	100	118	33	1.84	1.2	69	20	7.38	45.2	100	60		17	1.95	2.3	170	43	7.45
15	0	49.76	2	1	1	0	0	1	741	110	0	1529	0	1	1	1	0	0	1	20	1	0	0	1	33.4	3.87	5556	4881
16	0	74.61	1	0.05	1	0	1	1	24	5	1	1	1	1	0	0	0	1	0		1	0	0	1	24.7	6.71	59	27	7.4	28	142	100	142		3.36	18.6	792	81	7.48	35.4	105	45	233	72
17	1	66.95	1	1	1	0	0	7	1252	52	1	99	1	1	0	0	0	1	0		1	0	0	1	24.5	1.88	22	22	7.38	35	193.5	100			1.35	2.2	114	26	7.39	45.9	121	100	121	20	1.86	1.4	42	21	7.52
18	1	37.98	1	5	1	1	0	2	409	18	1	18	0	1	1	0	0	1	1	10	1	0	0	1	22.5	0.69	400	80							0.78	2.2	274	55	7.47	40.2	163	40		19
19	1	53.68	1	4	1	0	0	7	502	41	0	1337	0	1	0	0	1	0	1		1	0	0	1	23.2	1.25	200	130	7.18	40	58	100	58		1.57	1.6	153	65	7.46	43.2	154	50	308	46	1.6	6.4	347	114	7.44
20	0	63.51	1	4	0	1	1	8	190	8	1	8	0	1	0	0	0	1	1	15	1	0	0	1	30.9	1.4									1.66	1.3	1049	131	7.44	41.6	150	100	150	67	1.43	1.3	654	161	7.41
21	1	56.81	1	0.05	0	0	0	8	576	81	1	129	1	1	0	0	0	0	0		1	0	0	1	36	1.44	150	278	7.41	40.8	188.4	100			1.48	5.6	349	111	7.44	36.9	193	50	386	13	0.94	3.1	85	74	7.5
22	0	77.15	1	4	0	0	0	4	525	24	1	23	1	1	0	0	0	1	0	20	1	0	0	1	25.7	1.39	30	49	7.429	39.8	227.1	100		108	2.2	4.6	178	46	7.57	39.9	92	100	92	38	2.68	1.7	140	48	7.43
23	1	65.42	1	2	1	0	0	4	433	34	1	13	0	1	0	0	0	1	1	10	1	0	0	1	32.8	0.96	507	1269	7.36	46	124	100	124	29	0.99	3.9	91	66	7.51	34.7	204	100	204	15	0.84	2.3	49	50	7.5
24	1	69.46	1	0.05	0	0	1	8	187	16	1	8	1	1	0	0	0	1	0		1	0	0	1	21.2	1.15	18	12	7.44	38	270.1	100			1.32	4.6	473	73	7.54	28.8	311	50	622	28	0.88	4	247	92	7.47
25	0	53.22	1	5	0	0	0	4	1487	151	0	1080	1	1	0	0	1	0	1		1	0	0	1	32.8	1.84	812	653	7.326	32.5	248.9	100			3.93	5.3	18304	7586	7.52	41	102	80		131	1.81	18.9	4049	3004	7.46
26	0	67.52	0	4	0	1	0	7	824	37	1	35	0	1	1	0	0	1	1	10	1	0	0	1	30.9	1.73	717	273							2.03	2.2	217	40	7.47	38	230	70	328	23	1.65	1.6	81	31	7.5
27	0	16.43	0	3	0	0	0	6	303	77	0	987	0	1	1	1	0	0	1	11	1	0	0	1	14.8	0.73	1646	1753	7.33	36	345	80	431		0.54	12.2	495	796	7.49	36	148	50		21	0.5	10.5	135	312	7.43
28	0	49.65	0	4	1	1	0	5	2027	211	1	267	0	1	1	1	0	1	1		1	0	0	1	27.7	1.78									2.37	2.1	469	389	7.42	46.1	85	50	170	37	2.12	1.8	177	214	7.52
29	0	14.79	0	1	1	0	0	10	4718	213	1	187	0	1	1	0	0	1	1		1	0	0	1	15.3	1.11	65	172	7.32	43	92	100	92	18	1.39	1.4	117	170	7.45	40.3	185	40		8	0.67	0.6	58	80	7.41
30	1	76.77	0	7	0	0	1	7	161	18	1	7	1	1	0	0	0	1	0		1	0	0	1	21.1	0.87	18	24	7.34	34.3	213.6	100			1.45	1.6	481	63	7.53	30.8	147	80		55	2	3.4	236	56	7.51
31	0	11.76	0	3	0	0	0	5	562	51	0	838	0	1	0	0	1	0	1		1	0	0	1	19.8	0.39	123	69	7.41	40.8	93	100	93		0.31	0.8	54	33	7.36	41	110	80		8.8	0.32	1.1	38	25	7.37
32	0	35.63	0	1	0	1	1	4	85	5	1	4	0	1	0	0	0	1	1		1	0	0	1	26	1.73	1028	540	7.23	42	96	80	120		1.63	6.3	7486	1527	7.42	40	108	100	108	67	1.72	11	2818	669	7.41
33	0	70.21	1	5	0	0	1	6	134	7	1	6	1	1	0	0	0	1	0		1	0	0	1	26.1	1.79	28	22	7.26	41.4	234	100	234		2.07	5.6	484	162	7.32	44.6	286	100	286	141	1.12	8.3	780	131	7.46
34	0	25.44	0	1	0	0	0	4	457	52	1	19	0	1	1	0	0	1	0	15	1	0	0	1	24.6	1.28	17	13	7.34	41	351	100	351		3.68	1	72	21	7.42	37.7	120	40	300	12	4.55	1.1	24	15	7.32
35	0	35.62	0	0.05	0	0	1	8	198	14	1	8	1	1	0	0	0	1	0		1	0	0	1	25.7	1.39	23	16	7.34	44	129	100	129		1.43	19.7	1232	330	7.51	33	193	60		44	1.05	27.6	472	169	7.41
36	0	39.82	0	1	0	1	0	9	744	58	1	40	0	1	0	1	0	1	1	10	1	0	0	1	21.6	2.63	44	32	7.48	20	110	100	110		0.88	6.1	96	31	7.45	42	209	60		6	0.66	4.9	50	24	7.48
37	0	50.78	2	0.05	1	0	1	6	171	8	1	6	0	1	0	0	0	1	1		1	0	0	1	22.1	1.69	2596	290	7.44	38.7	123.6	70			2.2	7.3	8065	3100	7.44	42.3	134	50	268	48	2.04	6.7	2706	1490	7.43
38	0	45.73	2	5	0	0	1	1	0	1	1	1	1	1	0	0	0	1	1		1	0	0	1	35.1	1.77	185	138	7.25	49	219	95
39	0	20.12	0	3	0	0	1	18	384	27	1	20	0	1	0	1	0	1	1	8	1	0	0	1	16.5	2.4	2147	1537	7.44	34	422	100	422		1.47	0.6	758	1089	7.46	37.4	106		265	17	0.96	0.4	232	710	7.49
40	0	62.21	0	0.05	0	0	0	3	170	28	1	27	0	1	0	0	0	1	0		0	0	0	1	23	1.45	37	49	7.43	33	333	100	333		2.19	2.7	253	44	7.55	35.7	86	55		17	2.38	2.5	130	35	7.45
41	0	57.4	0	1	0	0	0	3	35	39	0	310	0	1	1	1	0	0	1	20	1	0	0	1	29	2.16	27	15	7.36	41	138	62			0.71	5	22	12	7.4	40.6	126	40	315	12
42	1	13.74	0	0.05	0	0	1	1	54	6	1	1	0	1	0	0	0	1	1		1	0	0	1	18.3	2.29	6713	3200	7.39	33.4	114	65		112					7.34	36.8	301	80		105
43	1	20.82	0	3	0	1	0	7	1252	53	1	53	0	1	1	0	0	1	1	15	1	0	0	1	21.6	0.92	310	227							2.51	6.8	194	134	7.57	35.2	271	70	387	26	2.02	3.5	220	179	7.49
44	1	16.43	0	3	0	1	0	10	295	12	1	10	0	1	0	0	0	1	1		1	0	0	1	22	0.93	501	219	7.45	23	212	100	212	77	1.05	8.4	862	207	7.51	41	197	70		24	1.24	3.6	799	210	7.51
45	0	33.61	0	1	0	0	0	6	968		0	124	0	1	1	0	0	0	0	15	1	0	0	1	24	3.29	732	367	7.41	30	72	80	90	27	1.54	5.2	356	205	7.4	43.4	104	30		13	1.14	6.3	298	211	7.43
46	1	50.35	0	3	0	0	0	16	447	20	1	19	0	1	0	0	0	1	0	10	1	0	0	1	27.7	2.82	6903	5374	6.87	25	233	100	233		1.61	6.5	7592	2902	7.52	33.9	197	70		29	1.25	9.4	2979	1842	7.42
47	0	56.72	0	1	0	0	0	8	792		0	83	0	1	1	0	0		1	15	1	0	0	1	25.5	4.77	4694	2325	7.13	69	97	100	97		4.59	5.5	2204	1347	7.55	31.6	240	50	480	29	4.94	5.4	465	636	7.5
48	1	60.83	0	4	0	1	0	10	749		0	82	0	1	1	0	0		1		1	0	0	1	27.5	1.7	1402	795	7.16	45.3	172	60	286	120	1.13	5.3	5974	3833	7.42	40.8	246	30	820	14	1.18	4.4	857	1737	7.4
[truncated: 15 more columns]
